# Supplementary material
Source: PubMed Central journal article supplement (PMC4843699)

## Supplementary material

**Supplementary Table S1.** List of all specimens used in the analyses from sampled litter macroinvertebrate communities at the German and Indonesian field sites (larval specimens were excluded from analyses). The majority of specimens collected in Germany were identified to taxonomic species, whereas all specimens from Indonesia were assigned to morphospecies.

| Region             | Class         | Order             | Species      | Individuals   |            |             |
|--------------------|---------------|-------------------|--------------|---------------|------------|-------------|
| Germany            | Arachnida     | Araneae           | 96           | 1799          |            |             |
|                    |               | Opiliones         | 12           | 136           |            |             |
|                    |               | Pseudoscorpionida | 5            | 46            |            |             |
|                    | Chilopoda     |                   | 14           | 689           |            |             |
|                    | Diplopoda     |                   | 24           | 617           |            |             |
|                    | Gastropoda    | Pulmonata         | 31           | 479           |            |             |
|                    | Insecta       | Coleoptera        |              | 172           | 720        |             |
|                    |               |                   | Dermaptera   | 2             | 67         |             |
|                    |               |                   | Hemiptera    | 29            | 86         |             |
|                    |               |                   | Hymenoptera  | 14            | 297        |             |
|                    |               |                   | Malacostraca | Isopoda       | 9          | 386         |
|                    |               |                   | <b>Total</b> |               | <b>408</b> | <b>5322</b> |
|                    |               |                   | Indonesia    | Arachnida     | Araneae    | 252         |
|                    | Opiliones     | 14                |              |               | 63         |             |
| Pseudoscorpionida  | 5             | 46                |              |               |            |             |
| Schizomida         | 1             | 2                 |              |               |            |             |
| Chilopoda          |               | 15                |              | 136           |            |             |
| Diplopoda          |               | 27                |              | 150           |            |             |
| Entognatha         | Diplura       | 1                 |              | 13            |            |             |
| Gastropoda         | Pulmonata     | 12                |              | 29            |            |             |
| Insecta            | Archaeognatha |                   |              | 3             | 20         |             |
|                    |               | Blattodea         |              | 25            | 326        |             |
|                    |               | Coleoptera        |              | 139           | 401        |             |
|                    |               | Dermaptera        |              | 5             | 34         |             |
|                    |               | Hemiptera         |              | 76            | 151        |             |
|                    |               | Hymenoptera       |              | 98            | 2963       |             |
|                    |               | Isoptera          |              | 14            | 778        |             |
|                    |               | Mantodea          |              | 4             | 15         |             |
|                    |               | Neuroptera        |              | 1             | 4          |             |
|                    |               | Orthoptera        |              | 25            | 128        |             |
|                    |               | Plecoptera        |              | 6             | 46         |             |
|                    |               | Psocoptera        |              | 17            | 507        |             |
|                    |               | Thysanoptera      |              | 9             | 41         |             |
|                    |               | Thysanura         |              | 1             | 1          |             |
|                    |               | Malacostraca      |              | Isopoda       | 36         | 128         |
|                    |               | Symphyla          |              |               | 2          | 35          |
|                    |               | <b>Total</b>      |              |               | <b>788</b> | <b>7096</b> |
| <b>Grand Total</b> |               | <b>1196</b>       |              | <b>12,418</b> |            |             |

**Supplementary Table S2.** Variables used to construct environmental dissimilarity matrices for the ‘environmental distance’ variable in the path model.  $R^2$  and p values are from the permutational vector fitting on NMDS ordinations of litter macroinvertebrate communities. Both untransformed and logged variables are shown, giving a total of 30 variables. Variables that were selected to be included in the environmental dissimilarity matrices are indicated by bold-face parameter values for the Indonesian and German data sets. Where both logged and untransformed variables were significant, we selected the variable with the highest  $R^2$  value.

| Factor                    | Indonesia    |              | Germany      |              |
|---------------------------|--------------|--------------|--------------|--------------|
|                           | $R^2$        | p-value      | $R^2$        | p-value      |
| litter depth              | <b>0.540</b> | <b>0.000</b> | 0.017        | 0.673        |
| soil pH                   | 0.307        | 0.005        | <b>0.456</b> | <b>0.000</b> |
| C (mg)                    | 0.179        | 0.055        | 0.032        | 0.481        |
| N (mg)                    | 0.064        | 0.379        | 0.243        | 0.002        |
| P (mg)                    | 0.201        | 0.036        | 0.098        | 0.102        |
| Al (mg)                   | 0.151        | 0.093        | 0.424        | 0.000        |
| Ca (mg)                   | 0.161        | 0.077        | <b>0.517</b> | <b>0.000</b> |
| Fe (mg)                   | 0.135        | 0.115        | 0.270        | 0.001        |
| K (mg)                    | 0.245        | 0.016        | 0.286        | 0.001        |
| Mg (mg)                   | 0.001        | 0.992        | 0.158        | 0.020        |
| Mn (mg)                   | 0.169        | 0.065        | 0.465        | 0.000        |
| Na (mg)                   | 0.011        | 0.843        | 0.190        | 0.010        |
| S (mg)                    | 0.169        | 0.068        | 0.064        | 0.220        |
| mean soil moisture        | <b>0.207</b> | <b>0.033</b> | 0.744        | 0.000        |
| mean soil temperature     | 0.432        | 0.000        | <b>0.385</b> | <b>0.000</b> |
| log litter depth          | 0.476        | 0.000        | 0.028        | 0.528        |
| log soil pH               | <b>0.323</b> | <b>0.003</b> | 0.418        | 0.000        |
| log C (mg)                | 0.061        | 0.410        | 0.008        | 0.840        |
| log N (mg)                | 0.107        | 0.191        | <b>0.262</b> | <b>0.001</b> |
| log P (mg)                | <b>0.216</b> | <b>0.028</b> | 0.108        | 0.079        |
| log Al (mg)               | 0.157        | 0.088        | <b>0.594</b> | <b>0.000</b> |
| log Ca (mg)               | <b>0.230</b> | <b>0.024</b> | 0.422        | 0.000        |
| log Fe (mg)               | 0.174        | 0.061        | <b>0.276</b> | <b>0.001</b> |
| log K (mg)                | <b>0.361</b> | <b>0.001</b> | <b>0.328</b> | <b>0.000</b> |
| log Mg (mg)               | 0.007        | 0.906        | <b>0.341</b> | <b>0.000</b> |
| log Mn (mg)               | 0.181        | 0.052        | <b>0.466</b> | <b>0.000</b> |
| log Na (mg)               | 0.010        | 0.868        | <b>0.191</b> | <b>0.009</b> |
| log S (mg)                | 0.177        | 0.059        | 0.114        | 0.061        |
| log mean soil moisture    | 0.113        | 0.173        | <b>0.766</b> | <b>0.000</b> |
| log mean soil temperature | <b>0.437</b> | <b>0.000</b> | 0.286        | 0.000        |

**Supplementary Table S3.** List of variables used in the path models, along with details of how they are measured or calculated and the distance measure used for the MRMs.

| <b>Variable in path model</b>     | <b>Details</b>                                                | <b>Distance measure</b> |
|-----------------------------------|---------------------------------------------------------------|-------------------------|
| geographic distance               | Calculated from GPS coordinates.                              | Great Circle distance   |
| environmental distance            | Composite variable from 15 measured environmental parameters. | Euclidean distance      |
| $\beta$ -diversity                | Species composition.                                          | Jaccard dissimilarity   |
| $\alpha$ -diversity dissimilarity | Dissimilarity among plots in total species richness.          | log response ratio      |
| FDis dissimilarity                | Dissimilarity among plots in functional dispersion.           | log response ratio      |
| biomass dissimilarity             | Dissimilarity among plots in total biomass.                   | log response ratio      |
| energy flux dissimilarity         | Dissimilarity among plots in total calculated energy flux.    | log response ratio      |

**Supplementary Table S4.** Parameters and their estimates from each of the two path models (from the Indonesian and German data sets). All response and predictor variables are dissimilarity matrices (e.g., ‘biomass’ denotes dissimilarity among plots in total biomass values).

| <b>Response</b>     |         | <b>Predictor</b>    | <b>Unstandardised coefficients</b> | <b>Range-standardized coefficients</b> | <b>P</b> |
|---------------------|---------|---------------------|------------------------------------|----------------------------------------|----------|
| <b>Indonesia</b>    |         |                     |                                    |                                        |          |
| environmental dist. | <<br>-- | geographic dist.    | 0.003                              | 0.096                                  | 0.008    |
| $\beta$ -diversity  | <<br>-- | geographic dist.    | 0.000                              | 0.108                                  | <0.001   |
| $\beta$ -diversity  | <<br>-- | environmental dist. | 0.020                              | 0.225                                  | <0.001   |
| $\alpha$ -diversity | <<br>-- | $\beta$ -diversity  | 3.709                              | 0.592                                  | <0.001   |
| FDis                | <<br>-- | geographic dist.    | 0.000                              | 0.096                                  | 0.010    |
| biomass             | <<br>-- | $\alpha$ -diversity | 0.797                              | 0.409                                  | <0.001   |
| energy flux         | <<br>-- | $\alpha$ -diversity | 0.432                              | 0.269                                  | <0.001   |
| energy flux         | <<br>-- | biomass             | 0.603                              | 0.733                                  | <0.001   |
| <b>Germany</b>      |         |                     |                                    |                                        |          |
| environmental dist. | <<br>-- | geographic dist.    | 0.001                              | 0.195                                  | <0.001   |
| $\beta$ -diversity  | <<br>-- | geographic dist.    | 0.000                              | 0.227                                  | <0.001   |
| $\beta$ -diversity  | <<br>-- | environmental dist. | 0.019                              | 0.157                                  | 0.020    |
| $\alpha$ -diversity | <<br>-- | geographic dist.    | -0.000                             | -0.094                                 | 0.006    |
| $\alpha$ -diversity | <<br>-- | $\beta$ -diversity  | 1.020                              | 0.411                                  | <0.001   |
| biomass             | <<br>-- | geographic dist.    | 0.000                              | 0.057                                  | 0.020    |
| biomass             | <<br>-- | $\alpha$ -diversity | 1.374                              | 0.351                                  | <0.001   |
| biomass             | <<br>-- | $\beta$ -diversity  | 3.364                              | 0.347                                  | <0.001   |
| energy flux         | <<br>-- | geographic dist.    | -0.000                             | -0.054                                 | 0.001    |
| energy flux         | <<br>-- | $\alpha$ -diversity | 0.579                              | 0.208                                  | <0.001   |
| energy flux         | <<br>-- | biomass             | 0.543                              | 0.765                                  | <0.001   |

**Supplementary Figure S1.** Study regions in a) Indonesia and b) Germany. The left-hand panels show the island of Sumatra within Indonesia and the country of Germany within Western Europe, with a magnification of the study regions in the right-hand panels. Green and yellow circles in a) denote the sampling plot locations for Bukit Duabelas and Harapan landscapes, respectively. Red, blue and orange circles in b) denote the sampling plot locations in the Swabian Alb Biosphere Reserve, Hainich National Park and the Schorfheide-Chorin Biosphere Reserve, respectively.

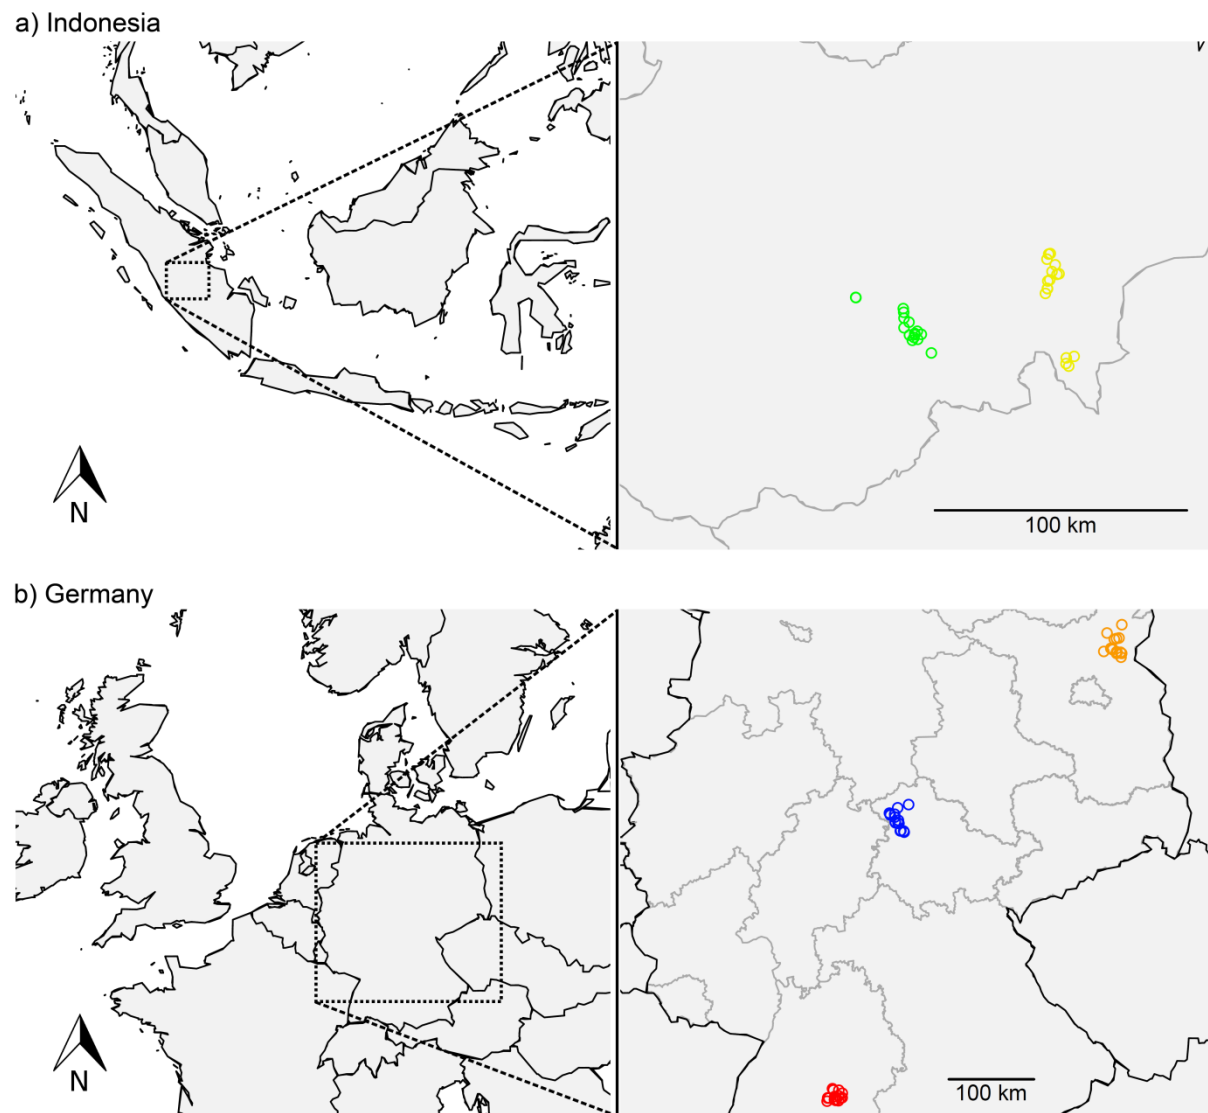

Supplement: rstb20150279supp1.pdf [file rstb20150279supp1.pdf]
